# Supplementary material for: Biodiversity and Interannual Variation of Harmful Algal Bloom Species in the Coastal Sea of Qinhuangdao, China
Source: MDPI journal article supplement (doi:10.3390/life13010192), 2023-01-09
Supplement: s1 [file s1]

There are two tables as supplementary materials of the manuscript, and with the captions for supplementary tables.

**Table S1** Sampling sites and environmental factors in the Qinhuangdao coastal sea in summers of 2014–2019

| Longitude       | Latitude      | Sampling sites    | Date               | Temperature<br>(°C) | Salinity<br>(PSU) | Chlorophyll-<br>a (µg/L) | DIN (mg/L)    | DIP (mg/L)    |
|-----------------|---------------|-------------------|--------------------|---------------------|-------------------|--------------------------|---------------|---------------|
| 119.29-119.59°E | 39.44-39.78°N | 24 (BY01-BY24)    | August 6-18, 2014  | 25.83±0.48          | 29.94±0.72        | 4.74±4.00                | 0.1708±0.0423 | 0.0075±0.0021 |
| 119.29-119.59°E | 39.44-39.78°N | 24 (BY01-BY24)    | August 7-23, 2015  | 28.10±1.10          | 30.80±0.46        | 5.90±5.11                | 0.1417±0.0319 | 0.0075±0.0035 |
| 119.29-119.59°E | 39.44-39.78°N | 24 (BY01-BY24)    | August 10-29, 2016 | 27.00±0.78          | 30.47±0.68        | 6.89±3.79                | 0.1503±0.081  | 0.0021±0.0017 |
| 119.29-119.59°E | 39.44-39.78°N | 24 (BY01-BY24)    | August 9-26, 2017  | 27.72±0.58          | 31.36±0.44        | 3.42±2.04                | 0.0631±0.0296 | 0.0045±0.0034 |
| 119.29-119.59°E | 39.44-39.78°N | 24 (BY01-BY24)    | August 2-26, 2018  | 26.66±0.44          | 30.14±1.43        | 12.88±9.61               | 0.0865±0.085  | 0.0077±0.0084 |
| 119.42-119.59°E | 39.50-39.70°N | 2 (BY06 and BY22) | August 8-19, 2019  | 27.30±0.50          | 31.62±0.47        | 3.84±2.48                | 0.1167±0.0665 | 0.0023±0.0003 |

**Table S2** List of 100 algal species identified in this study

| NO | Species                                              | Phylum          | Class             |
|----|------------------------------------------------------|-----------------|-------------------|
| 1  | <i>Achnanthes brevipes</i>                           | Bacillariophyta | Bacillariophyceae |
| 2  | <i>Akashiwo sanguinea</i>                            | Dinoflagellata  | Dinophyceae       |
| 3  | <i>Asterionellopsis glacialis</i>                    | Bacillariophyta | Bacillariophyceae |
| 4  | <i>Bacillaria paxillifera</i>                        | Bacillariophyta | Bacillariophyceae |
| 5  | <i>Bacteriastrium hyalinum</i>                       | Bacillariophyta | Bacillariophyceae |
| 6  | <i>Biddulphia biddulphiana</i>                       | Mediophyceae    | Bacillariophyceae |
| 7  | <i>Cerataulina pelagica</i>                          | Bacillariophyta | Mediophyceae      |
| 8  | <i>Ceratium breve</i>                                | Dinoflagellata  | Dinophyceae       |
| 9  | <i>Ceratium furca</i>                                | Dinoflagellata  | Dinophyceae       |
| 10 | <i>Ceratium fusus</i>                                | Dinoflagellata  | Dinophyceae       |
| 11 | <i>Ceratium lineatum</i>                             | Dinoflagellata  | Dinophyceae       |
| 12 | <i>Ceratium massiliense</i>                          | Dinoflagellata  | Dinophyceae       |
| 13 | <i>Ceratium tripos</i>                               | Dinoflagellata  | Dinophyceae       |
| 14 | <i>Chaetoceros affinis</i>                           | Bacillariophyta | Mediophyceae      |
| 15 | <i>Chaetoceros atlanticus</i> var. <i>atlanticus</i> | Bacillariophyta | Mediophyceae      |
| 16 | <i>Chaetoceros castracanei</i>                       | Bacillariophyta | Mediophyceae      |
| 17 | <i>Chaetoceros coarctatus</i>                        | Bacillariophyta | Mediophyceae      |
| 18 | <i>Chaetoceros compressus</i>                        | Bacillariophyta | Mediophyceae      |
| 19 | <i>Chaetoceros constrictus</i>                       | Bacillariophyta | Mediophyceae      |
| 20 | <i>Chaetoceros crinitus</i>                          | Bacillariophyta | Mediophyceae      |
| 21 | <i>Chaetoceros curvisetus</i>                        | Bacillariophyta | Mediophyceae      |
| 22 | <i>Chaetoceros debilis</i>                           | Bacillariophyta | Mediophyceae      |
| 23 | <i>Chaetoceros decipiens</i> f. <i>decipiens</i>     | Bacillariophyta | Mediophyceae      |

|    |                                            |                 |                     |
|----|--------------------------------------------|-----------------|---------------------|
| 24 | <i>Chaetoceros decipiens f. singularis</i> | Bacillariophyta | Mediophyceae        |
| 25 | <i>Chaetoceros densus</i>                  | Bacillariophyta | Mediophyceae        |
| 26 | <i>Chaetoceros diadema</i>                 | Bacillariophyta | Mediophyceae        |
| 27 | <i>Chaetoceros didymus</i>                 | Bacillariophyta | Mediophyceae        |
| 28 | <i>Chaetoceros distans</i>                 | Bacillariophyta | Mediophyceae        |
| 29 | <i>Chaetoceros knipowitschii</i>           | Bacillariophyta | Mediophyceae        |
| 30 | <i>Chaetoceros lorenzianus</i>             | Bacillariophyta | Mediophyceae        |
| 31 | <i>Chaetoceros nipponica</i>               | Bacillariophyta | Mediophyceae        |
| 32 | <i>Chaetoceros paradoxus</i>               | Bacillariophyta | Mediophyceae        |
| 33 | <i>Chaetoceros peruvianus</i>              | Bacillariophyta | Mediophyceae        |
| 34 | <i>Chaetoceros siamense</i>                | Bacillariophyta | Mediophyceae        |
| 35 | <i>Chaetoceros socialis</i>                | Bacillariophyta | Mediophyceae        |
| 36 | <i>Chaetoceros teres</i>                   | Bacillariophyta | Mediophyceae        |
| 37 | <i>Chaetoceros tortissimus</i>             | Bacillariophyta | Mediophyceae        |
| 38 | <i>Chaetoceros vanheurcki</i>              | Bacillariophyta | Mediophyceae        |
| 39 | <i>Chattonella marina</i>                  | Ochrophyta      | Raphidophyceae      |
| 40 | <i>Corethron criophilum</i>                | Bacillariophyta | Mediophyceae        |
| 41 | <i>Coscinodiscus asteromphalus</i>         | Bacillariophyta | Coscinodiscophyceae |
| 42 | <i>Coscinodiscus granii</i>                | Bacillariophyta | Coscinodiscophyceae |
| 43 | <i>Coscinodiscus radiatus</i>              | Bacillariophyta | Coscinodiscophyceae |
| 44 | <i>Coscinodiscus subtilis</i>              | Bacillariophyta | Coscinodiscophyceae |
| 45 | <i>Coscinodiscus wailesii</i>              | Bacillariophyta | Coscinodiscophyceae |
| 46 | <i>Dictyocha fibula</i>                    | Ochrophyta      | Dictyochophyceae    |
| 47 | <i>Dinophysis acuminata</i>                | Dinoflagellata  | Dinophyceae         |
| 48 | <i>Dinophysis caudate</i>                  | Dinoflagellata  | Dinophyceae         |
| 49 | <i>Ditylum brightwellii</i>                | Bacillariophyta | Mediophyceae        |

|    |                                |                 |                     |
|----|--------------------------------|-----------------|---------------------|
| 50 | <i>Eucampia cornuta</i>        | Bacillariophyta | Mediophyceae        |
| 51 | <i>Eucampia zodiacus</i>       | Bacillariophyta | Mediophyceae        |
| 52 | <i>Guinardia delicatula</i>    | Bacillariophyta | Coscinodiscophyceae |
| 53 | <i>Guinardia flaccida</i>      | Bacillariophyta | Coscinodiscophyceae |
| 54 | <i>Guinardia striata</i>       | Bacillariophyta | Coscinodiscophyceae |
| 55 | <i>Gymnodinium catenatum</i>   | Dinoflagellata  | Dinophyceae         |
| 56 | <i>Gyrodinium spirale</i>      | Dinoflagellata  | Dinophyceae         |
| 57 | <i>Helicotheca tamesis</i>     | Bacillariophyta | Mediophyceae        |
| 58 | <i>Helicotheca tamesis</i>     | Bacillariophyta | Mediophyceae        |
| 59 | <i>Hemiaulus sinensis</i>      | Bacillariophyta | Mediophyceae        |
| 60 | <i>Leptocylindrus danicus</i>  | Bacillariophyta | Mediophyceae        |
| 61 | <i>Leptocylindrus minimus</i>  | Bacillariophyta | Mediophyceae        |
| 62 | <i>Licmophora abbreviata</i>   | Bacillariophyta | Bacillariophyceae   |
| 63 | <i>Lithodesmium undulatum</i>  | Bacillariophyta | Mediophyceae        |
| 64 | <i>Melosira sulcata</i>        | Bacillariophyta | Coscinodiscophyceae |
| 65 | <i>Nitzschia closterium</i>    | Bacillariophyta | Bacillariophyceae   |
| 66 | <i>Nitzschia lorenziana</i>    | Bacillariophyta | Bacillariophyceae   |
| 67 | <i>Noctiluca scintillans</i>   | Dinoflagellata  | Noctilucaceae       |
| 68 | <i>Odontella mobiliensis</i>   | Bacillariophyta | Mediophyceae        |
| 69 | <i>Odontella regia</i>         | Bacillariophyta | Mediophyceae        |
| 70 | <i>Odontella sinensis</i>      | Bacillariophyta | Mediophyceae        |
| 71 | <i>Peridinium quinquecorne</i> | Dinoflagellata  | Dinophyceae         |
| 72 | <i>Pleurosigma pelagicum</i>   | Bacillariophyta | Bacillariophyceae   |
| 73 | <i>Prorocentrum micans</i>     | Dinoflagellata  | Dinophyceae         |
| 74 | <i>Prorocentrum minimum</i>    | Dinoflagellata  | Dinophyceae         |
| 75 | <i>Prorocentrum triestinum</i> | Dinoflagellata  | Dinophyceae         |

|     |                                             |                 |                      |
|-----|---------------------------------------------|-----------------|----------------------|
| 76  | <i>Protoperidinium bipes</i>                | Dinoflagellata  | Dinophyceae          |
| 77  | <i>Protoperidinium conicum</i>              | Dinoflagellata  | Dinophyceae          |
| 78  | <i>Protoperidinium elegans</i>              | Dinoflagellata  | Dinophyceae          |
| 79  | <i>Protoperidinium grande</i>               | Dinoflagellata  | Dinophyceae          |
| 80  | <i>Protoperidinium pallidum</i>             | Dinoflagellata  | Dinophyceae          |
| 81  | <i>Protoperidinium pellucidum</i>           | Dinoflagellata  | Dinophyceae          |
| 82  | <i>Protoperidinium pentagonum</i>           | Dinoflagellata  | Dinophyceae          |
| 83  | <i>Protoperidinium venustum</i>             | Dinoflagellata  | Dinophyceae          |
| 84  | <i>Pseudo-nitzschia delicatissima</i>       | Bacillariophyta | Bacillariophyceae    |
| 85  | <i>Pseudo-nitzschia pungens</i>             | Bacillariophyta | Bacillariophyceae    |
| 86  | <i>Pyrophacus steinii</i>                   | Dinoflagellata  | Dinophyceae          |
| 87  | <i>Rhizosolenia alata f. gracillima</i>     | Bacillariophyta | Coscinodiscophyceae  |
| 88  | <i>Rhizosolenia alata f. indica</i>         | Bacillariophyta | Coscinodiscophyceae  |
| 89  | <i>Rhizosolenia hyalina</i>                 | Bacillariophyta | Coscinodiscophyceae  |
| 90  | <i>Rhizosolenia setigera</i>                | Bacillariophyta | Coscinodiscophyceae  |
| 91  | <i>Rhizosolenia styliiformis</i>            | Bacillariophyta | Coscinodiscophyceae  |
| 92  | <i>Schröderella delicatula f. schröderi</i> | Bacillariophyta | Coscinodiscophycidae |
| 93  | <i>Scrippsiella trochoidea</i>              | Dinoflagellata  | Dinophyceae          |
| 94  | <i>Skeletonema costatum</i>                 | Bacillariophyta | Mediophyceae         |
| 95  | <i>Stephanopyxis palmeriana</i>             | Bacillariophyta | Coscinodiscophyceae  |
| 96  | <i>Stephanopyxis turris</i>                 | Bacillariophyta | Coscinodiscophyceae  |
| 97  | <i>Thalassionema frauenfeldii</i>           | Bacillariophyta | Bacillariophyceae    |
| 98  | <i>Thalassionema nitzschioides</i>          | Bacillariophyta | Bacillariophyceae    |
| 99  | <i>Thalassiosira nordenskioldi</i>          | Bacillariophyta | Bacillariophyceae    |
| 100 | <i>Thalassiostris rotula</i>                | Bacillariophyta | Bacillariophyceae    |

---
