# Supplementary figures and images for: Biodiversity and Interannual Variation of Harmful Algal Bloom Species in the Coastal Sea of Qinhuangdao, China
Source: MDPI journal article supplement (doi:10.3390/life13010192), 2023-01-09

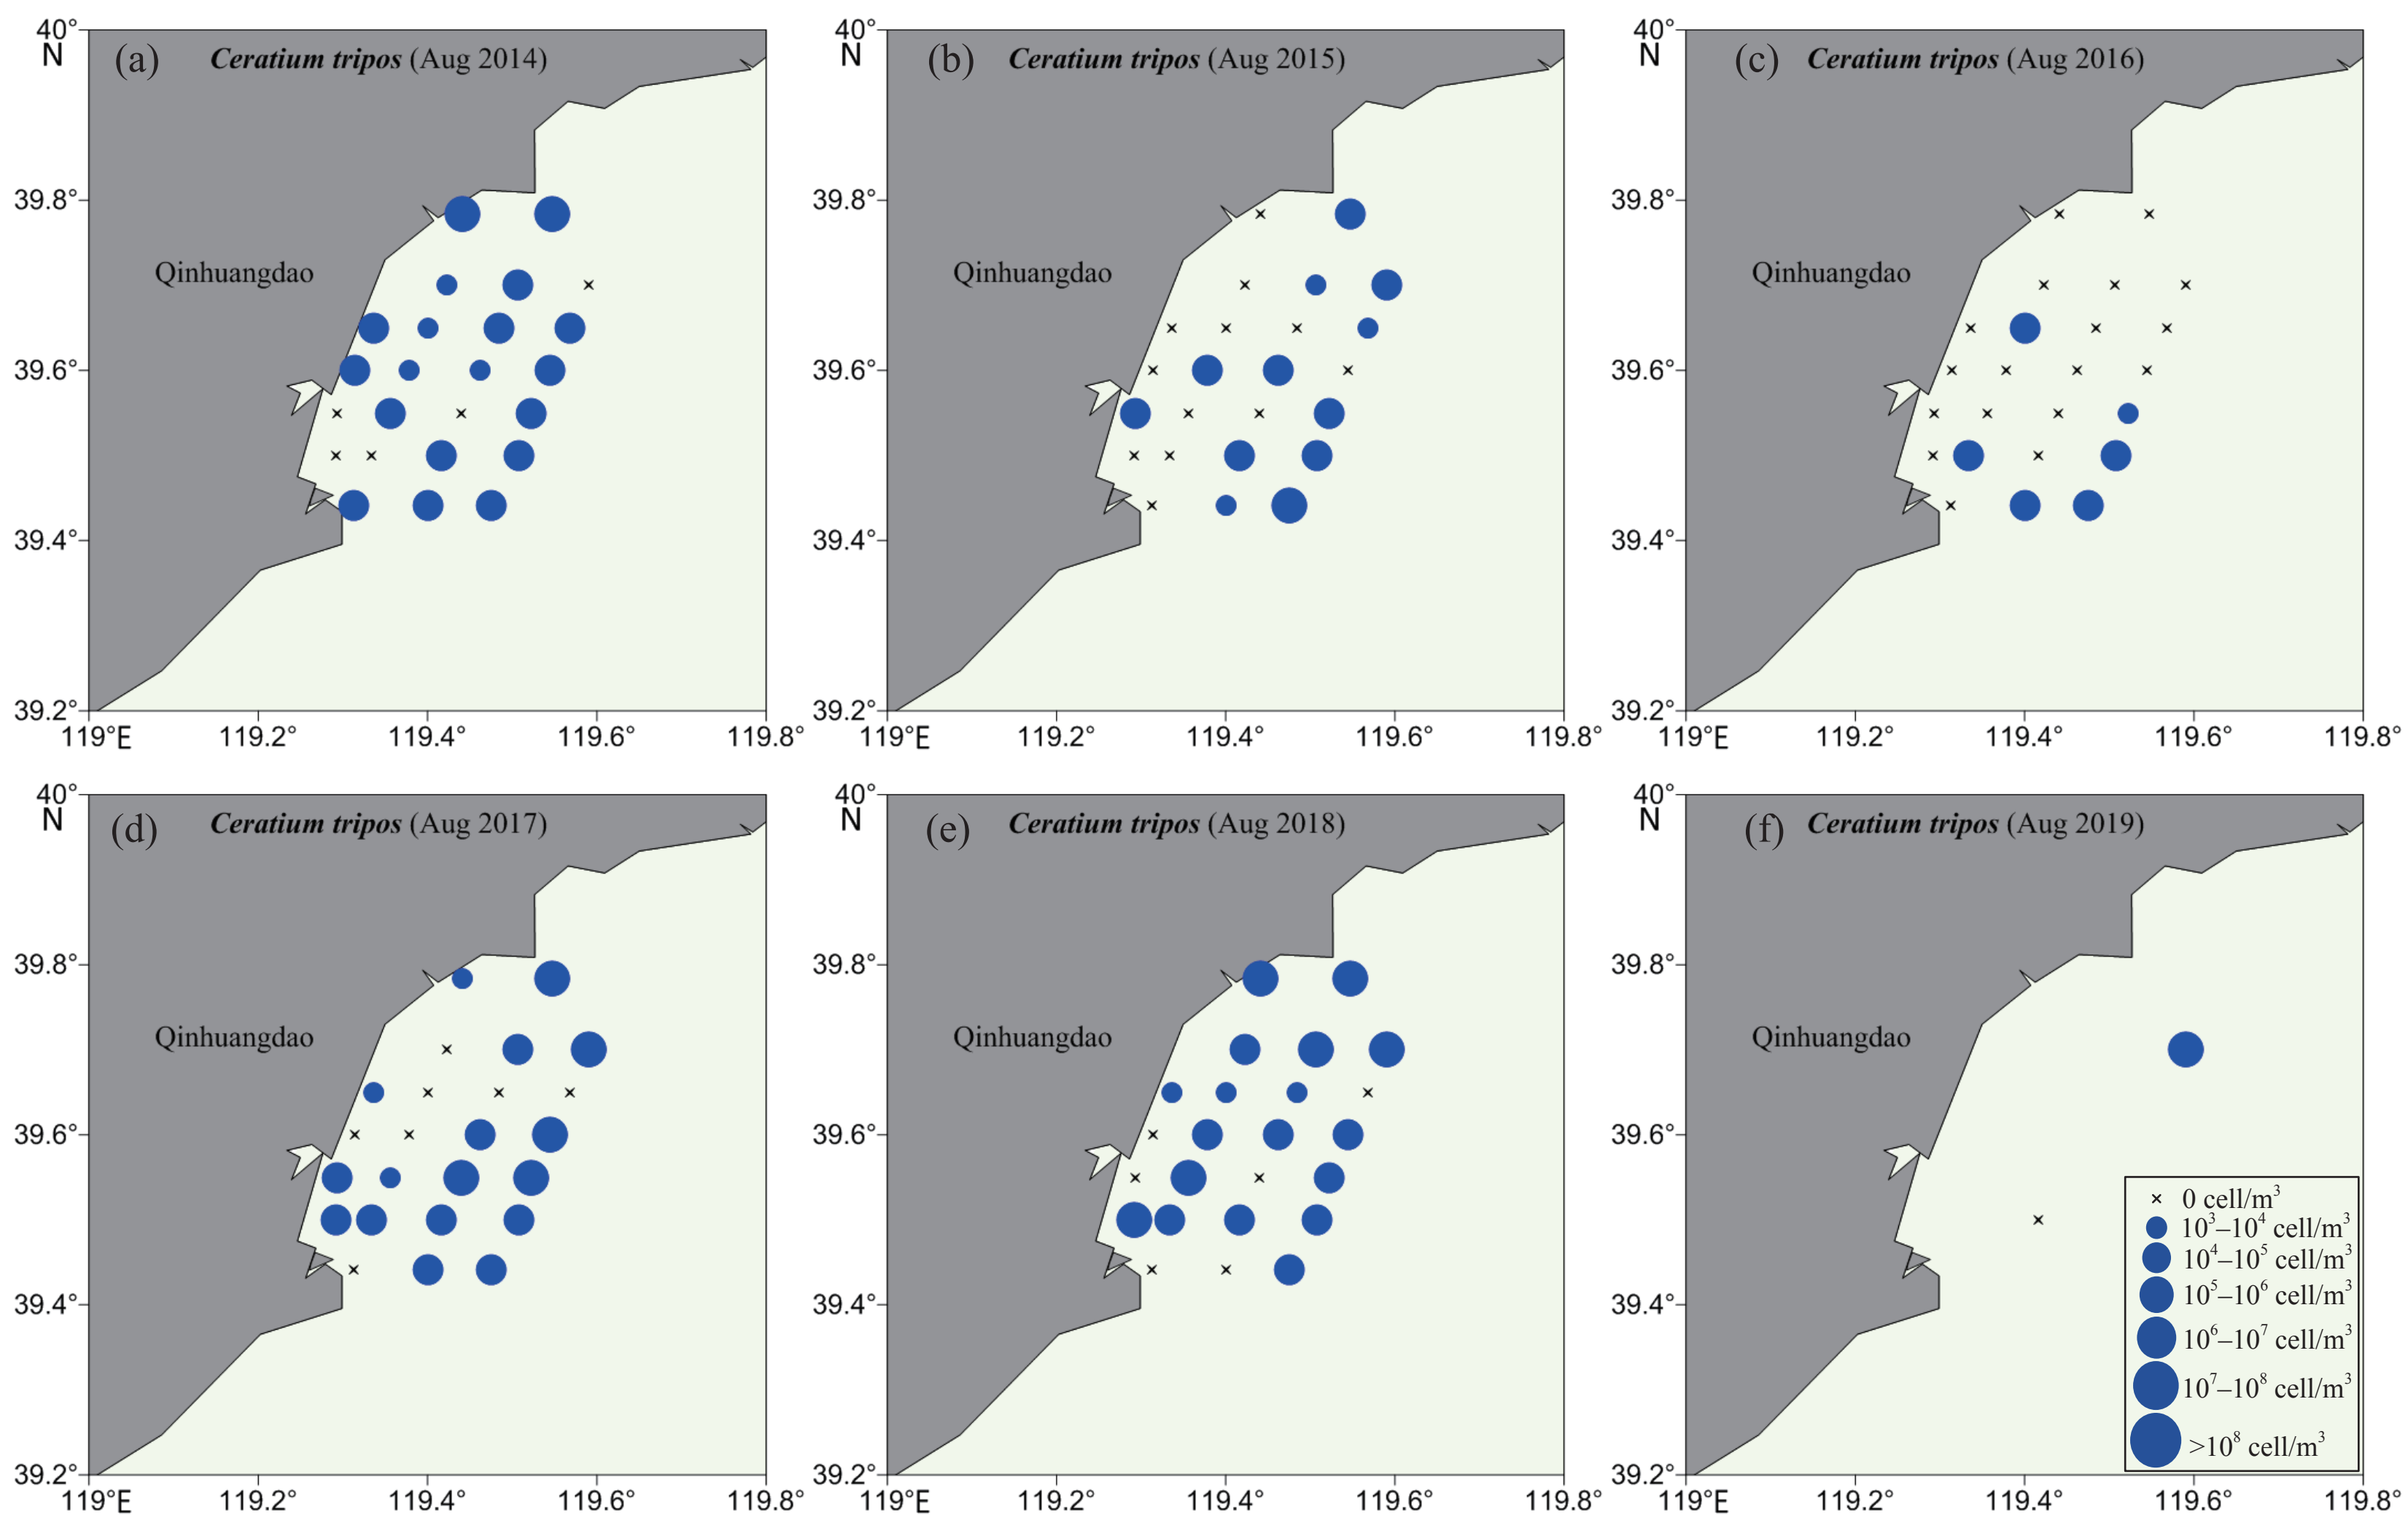

Supplement: s1 [file s1]

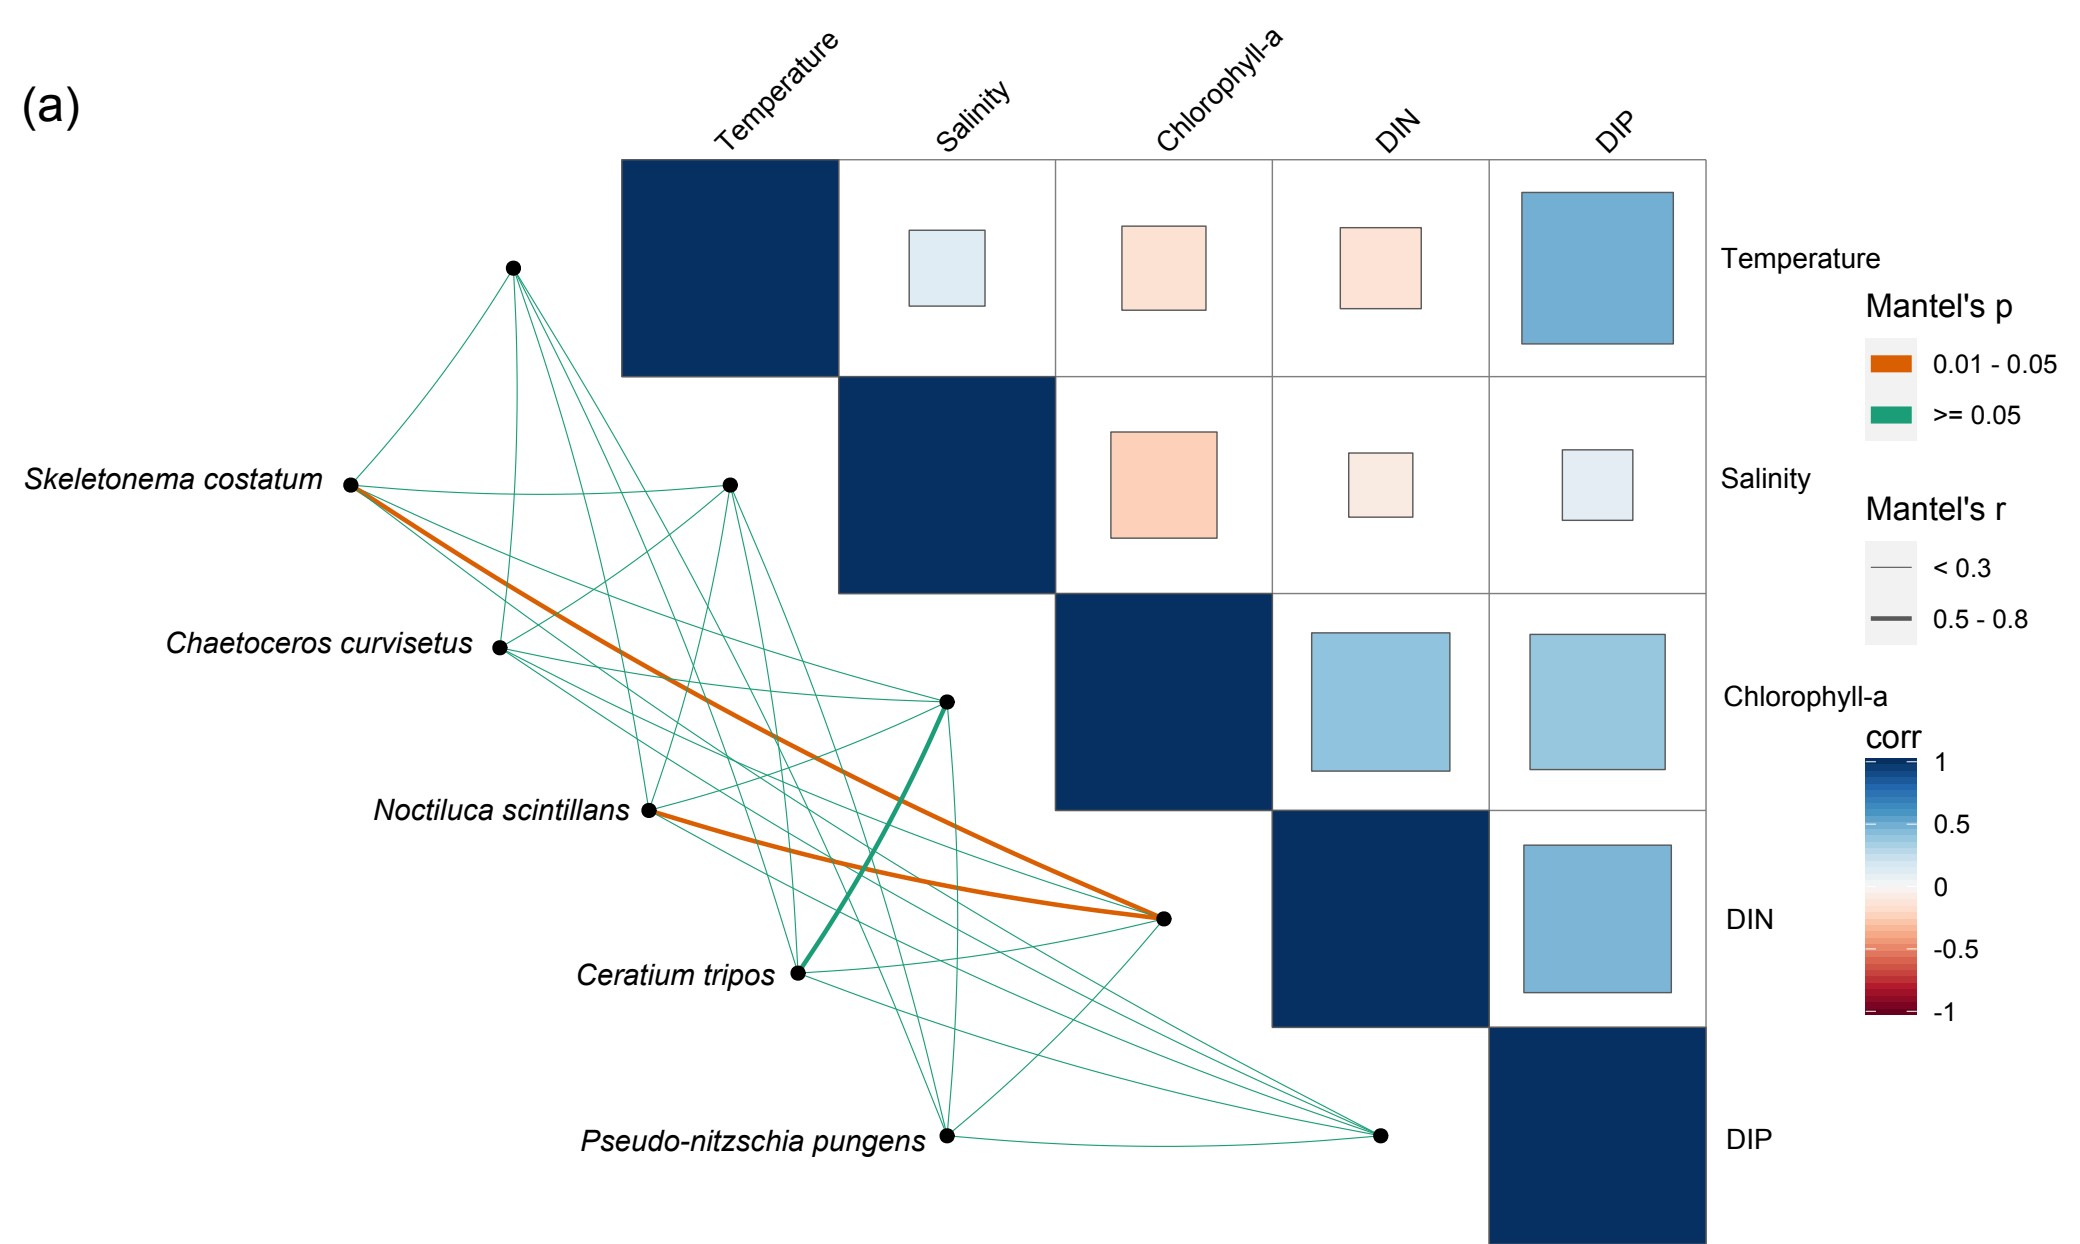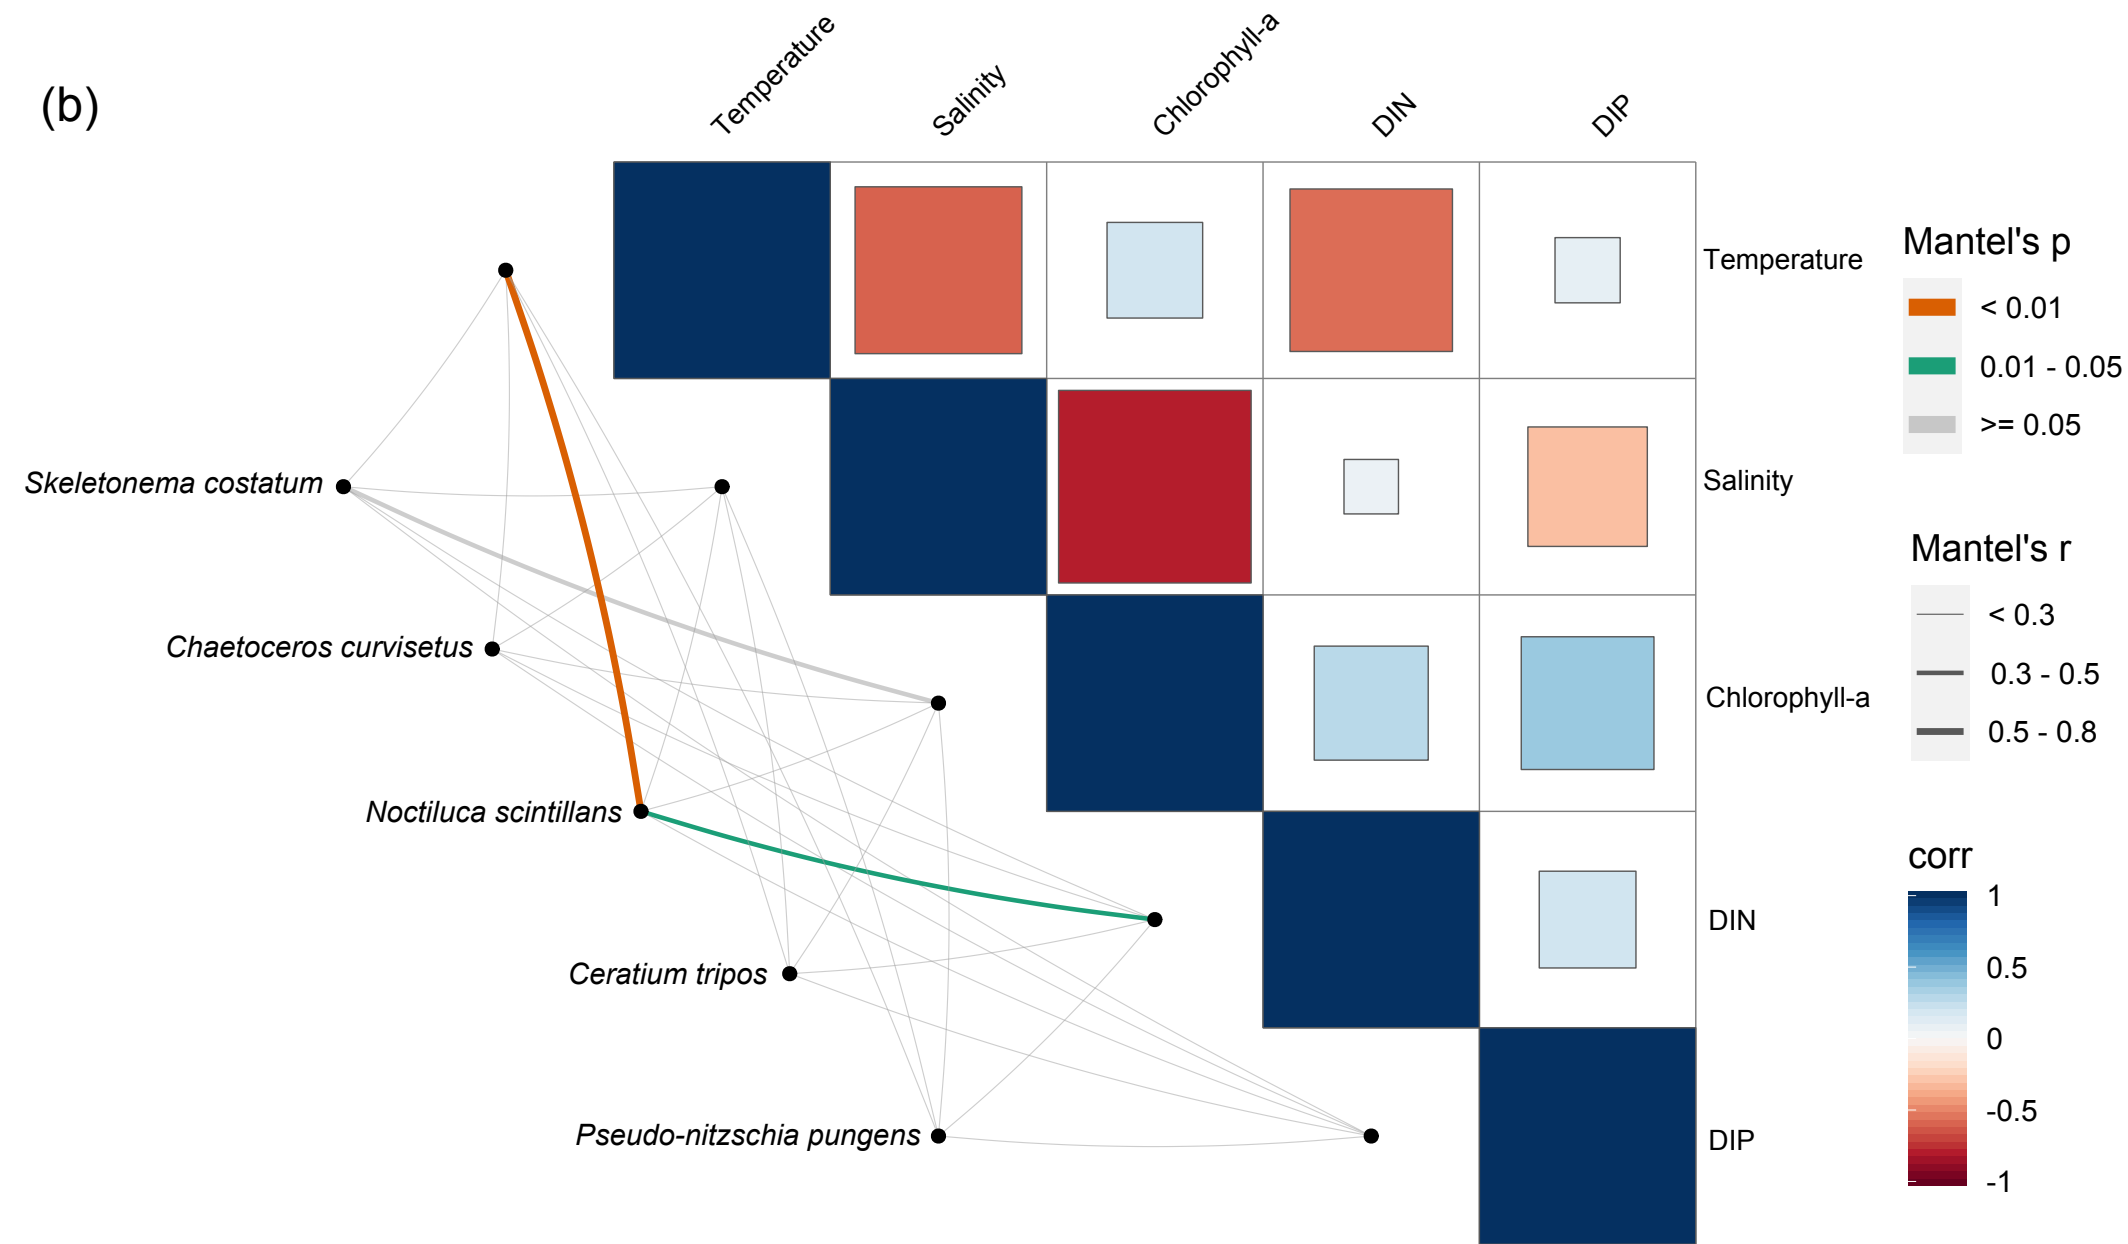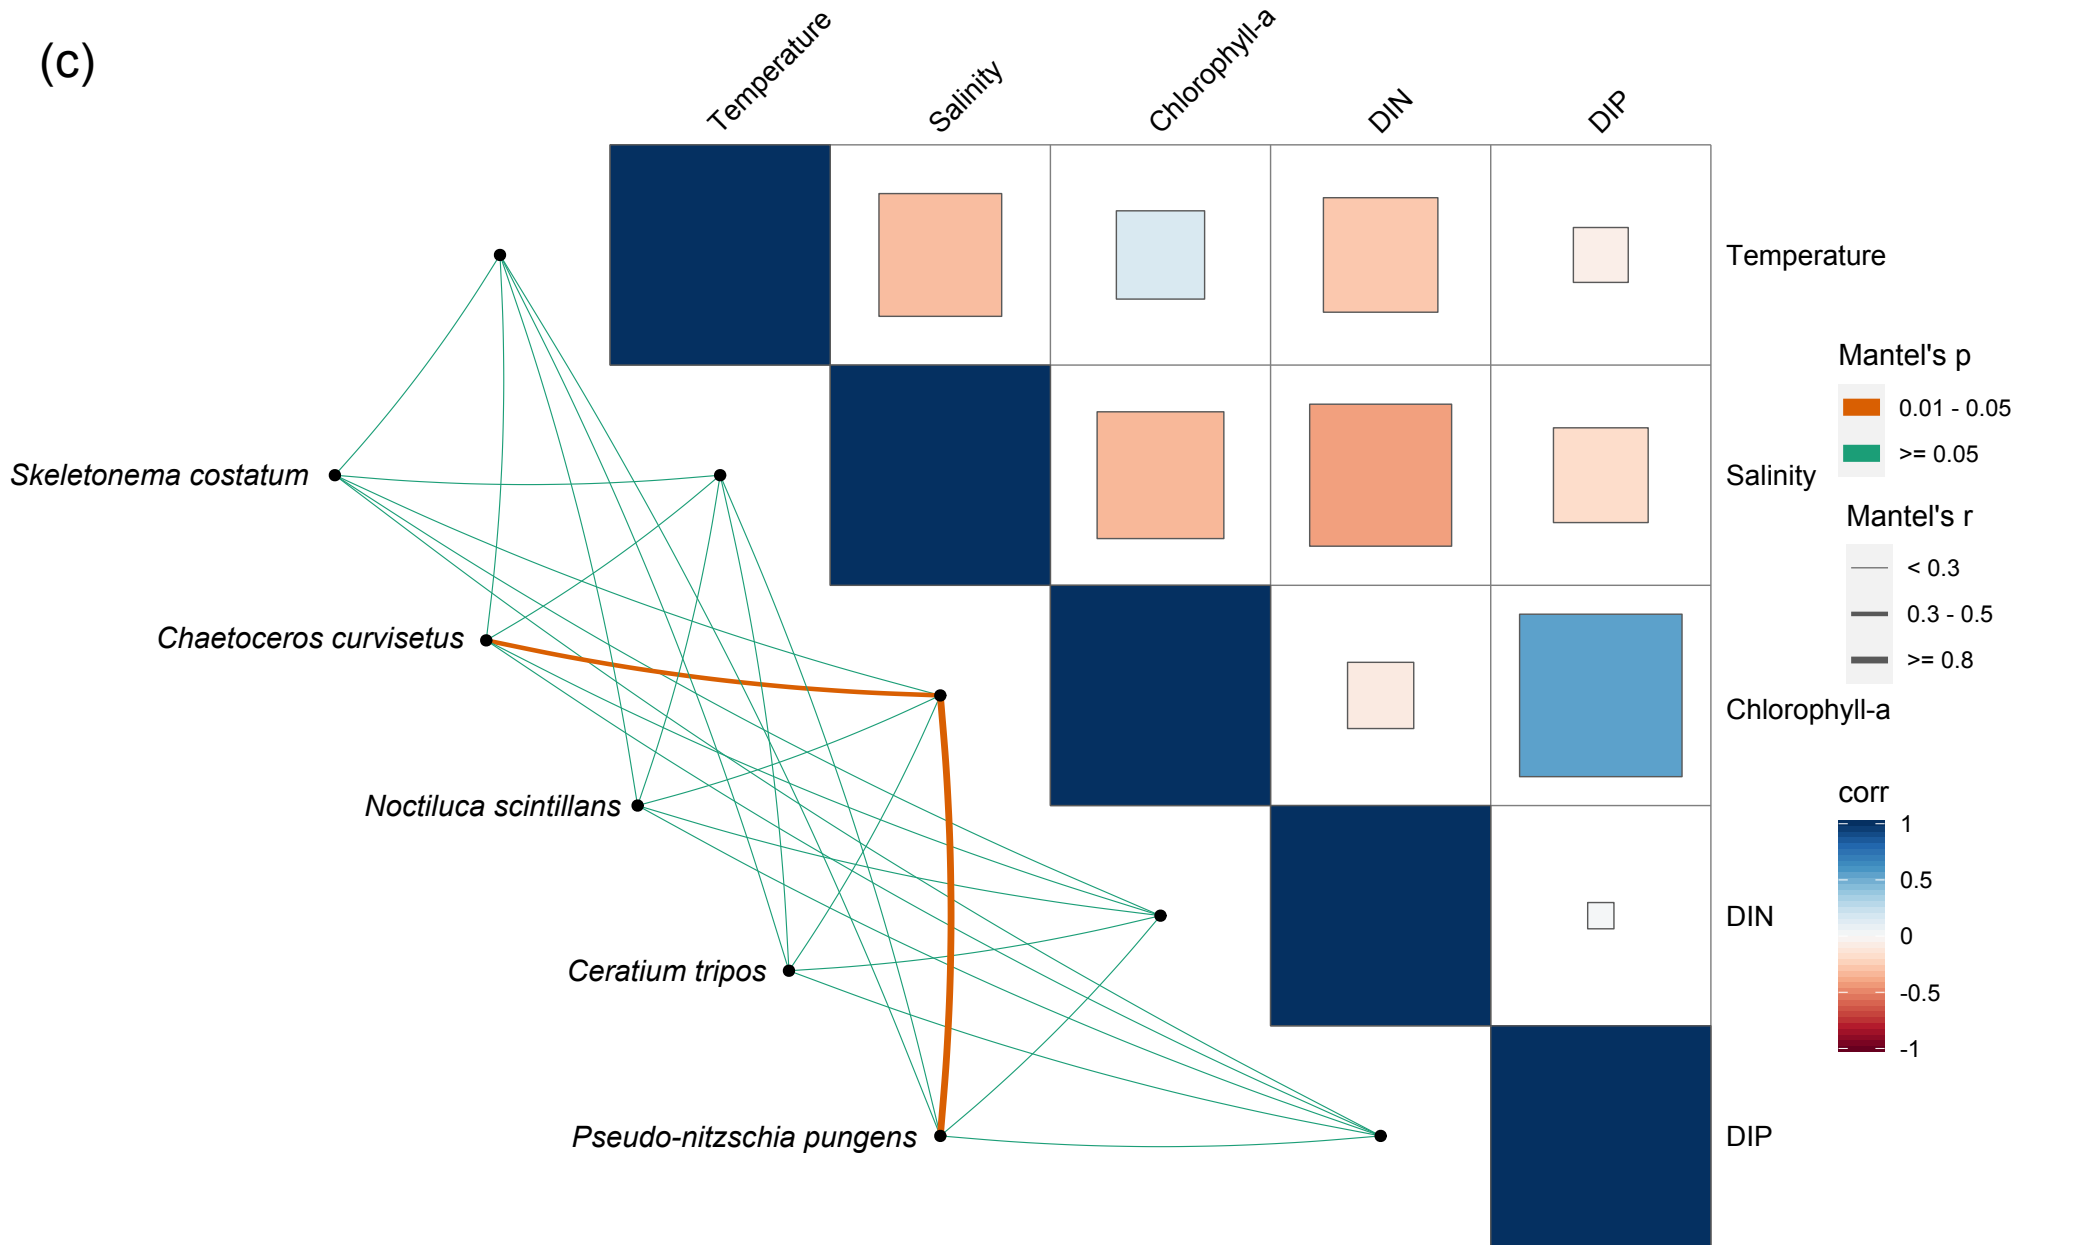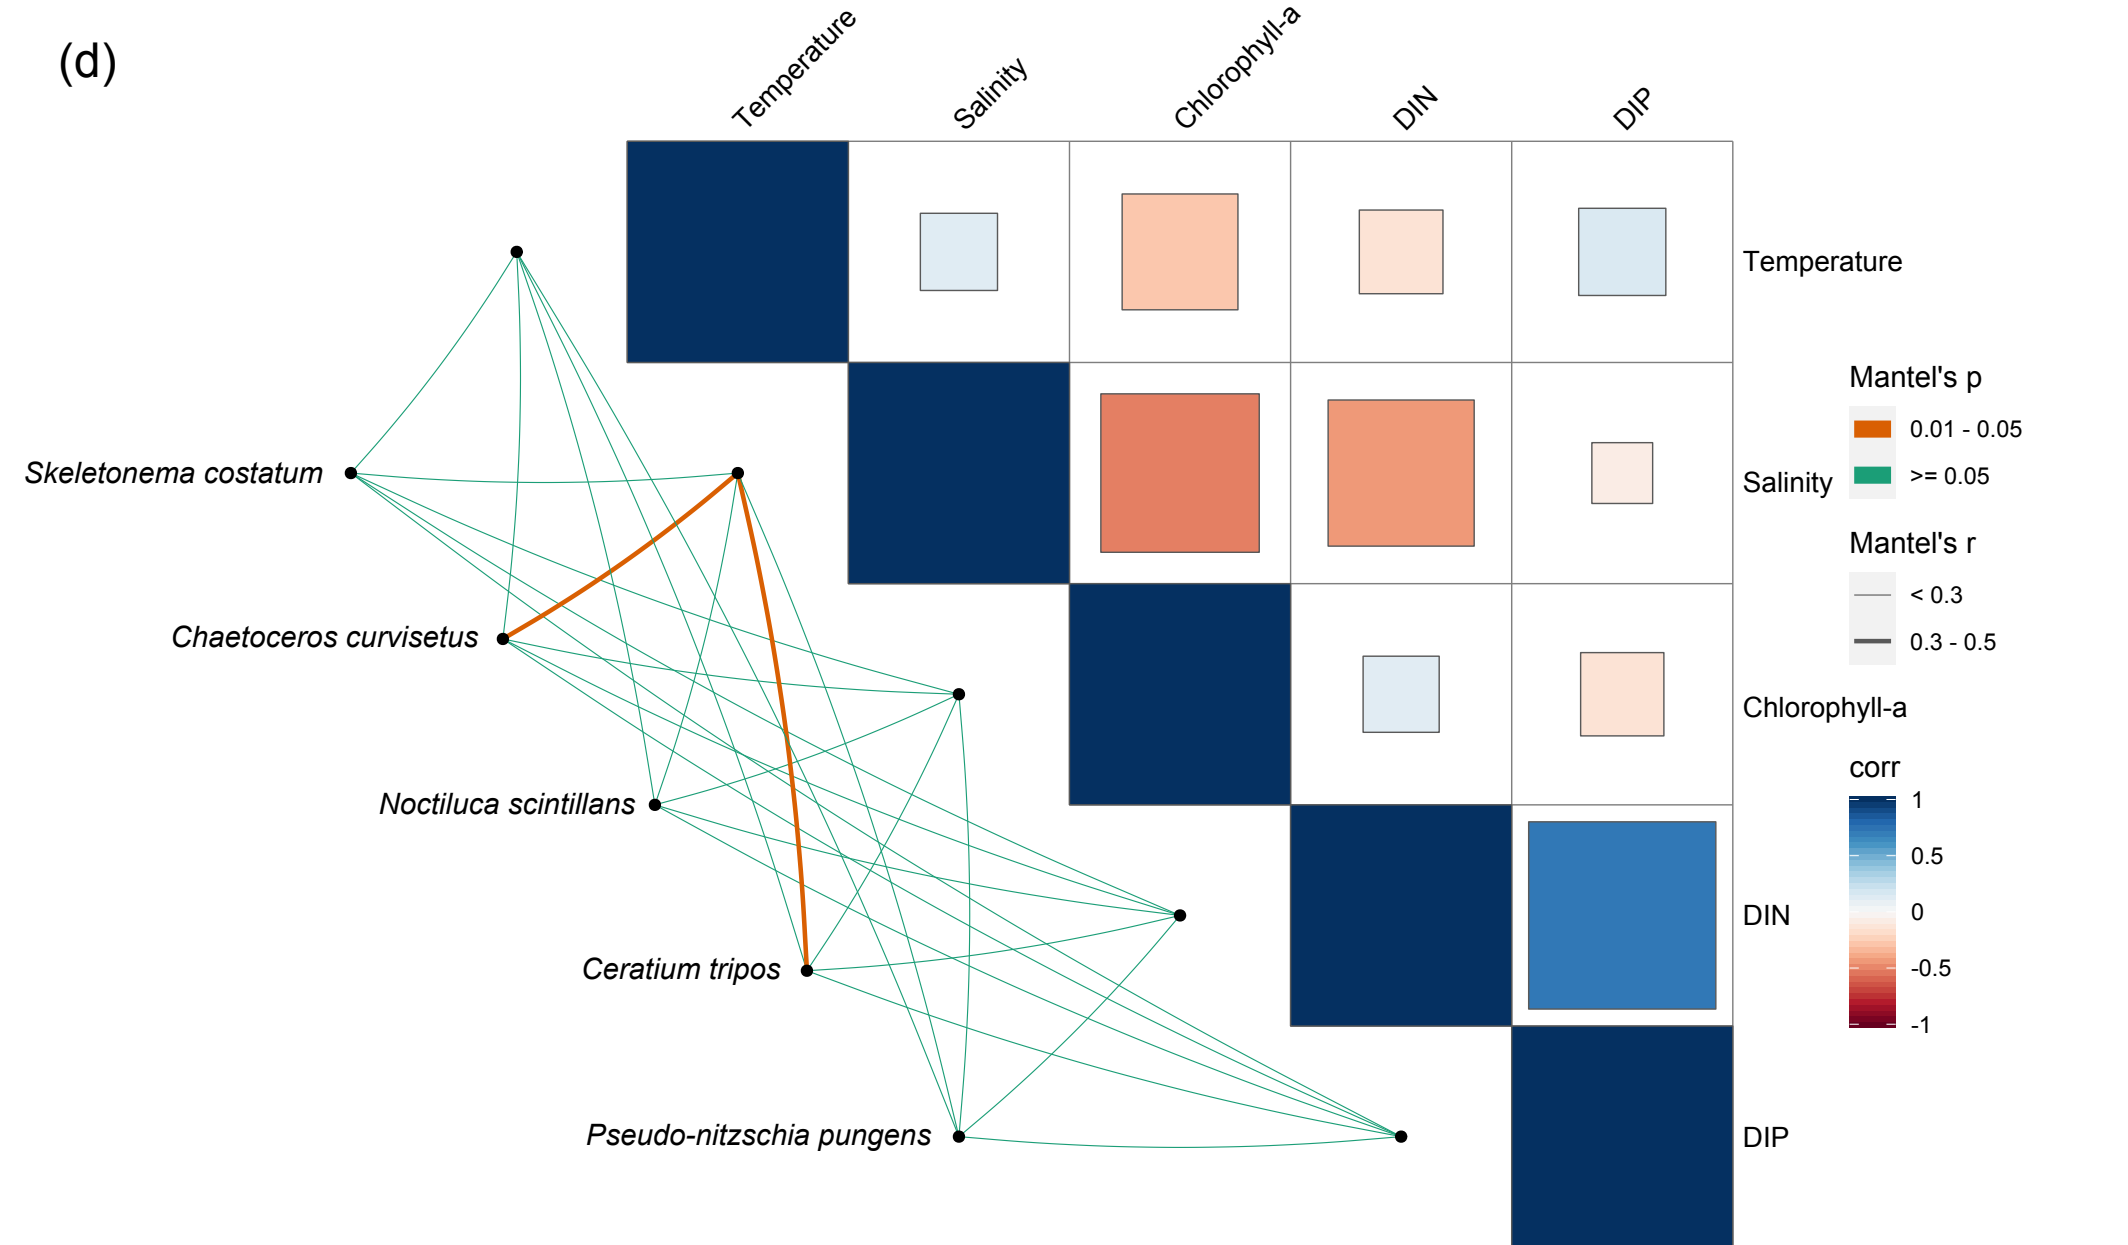

Supplement: s1 [file s1]

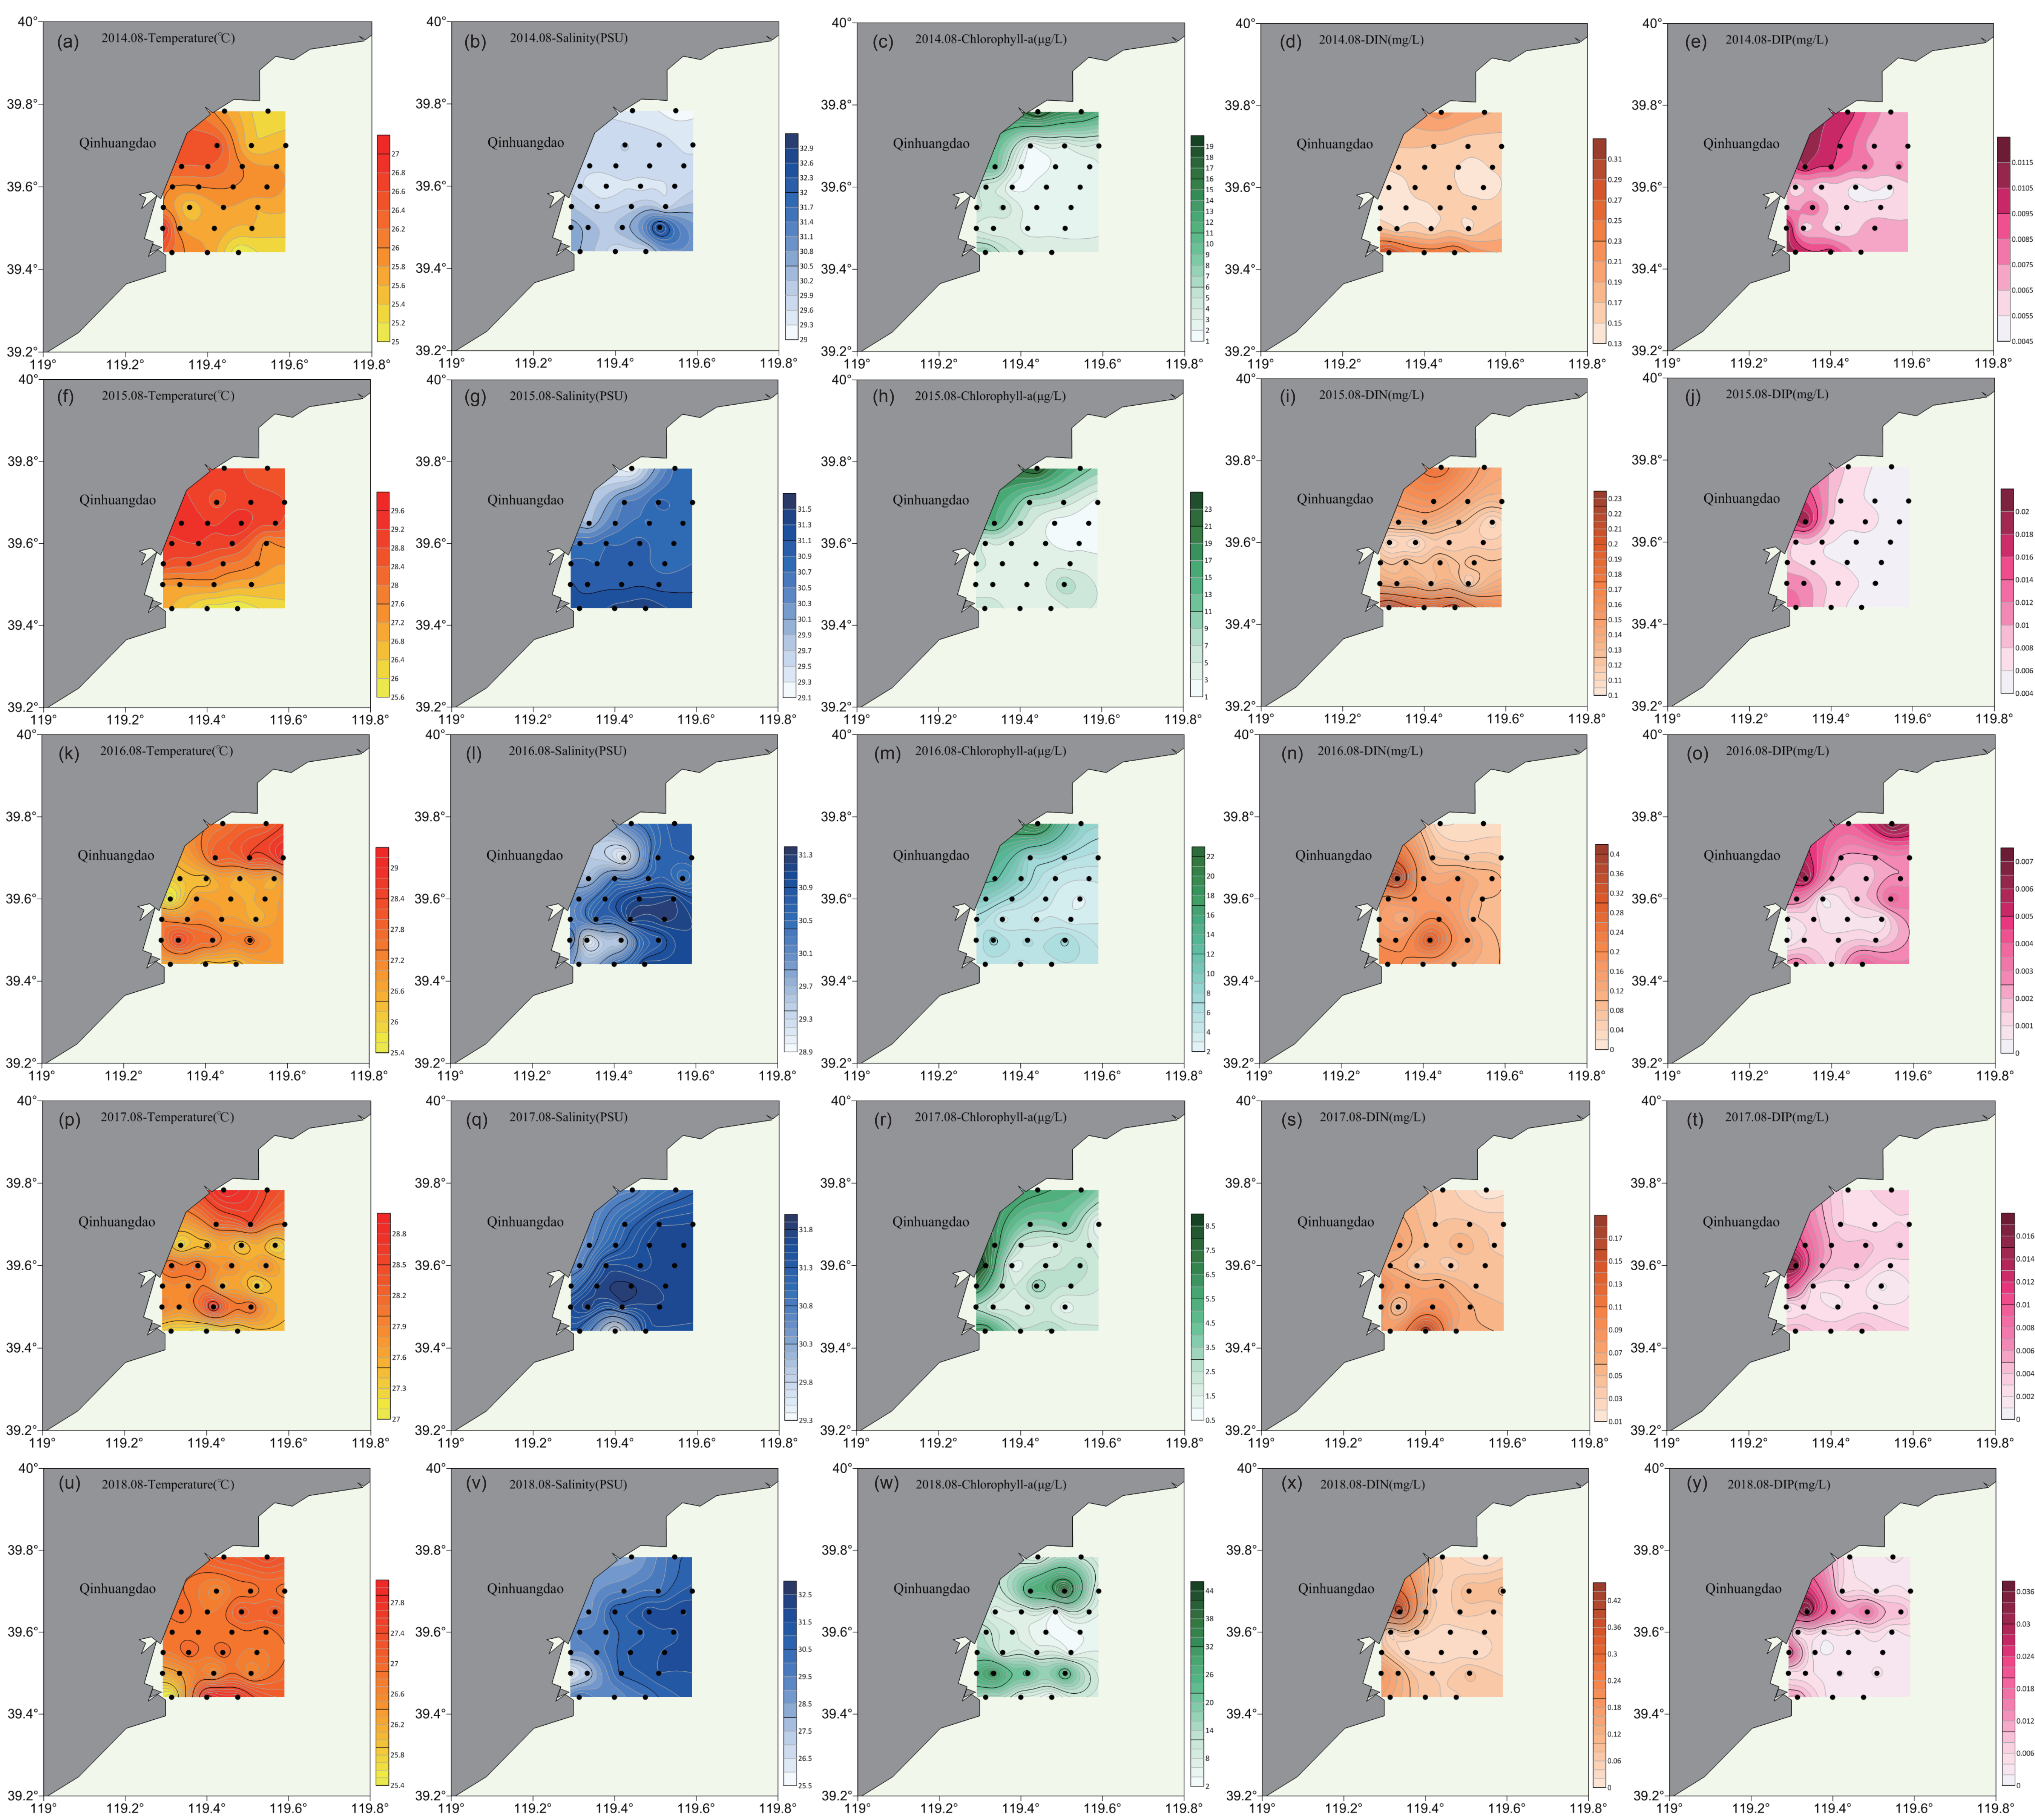

Supplement: s1 [file s1]

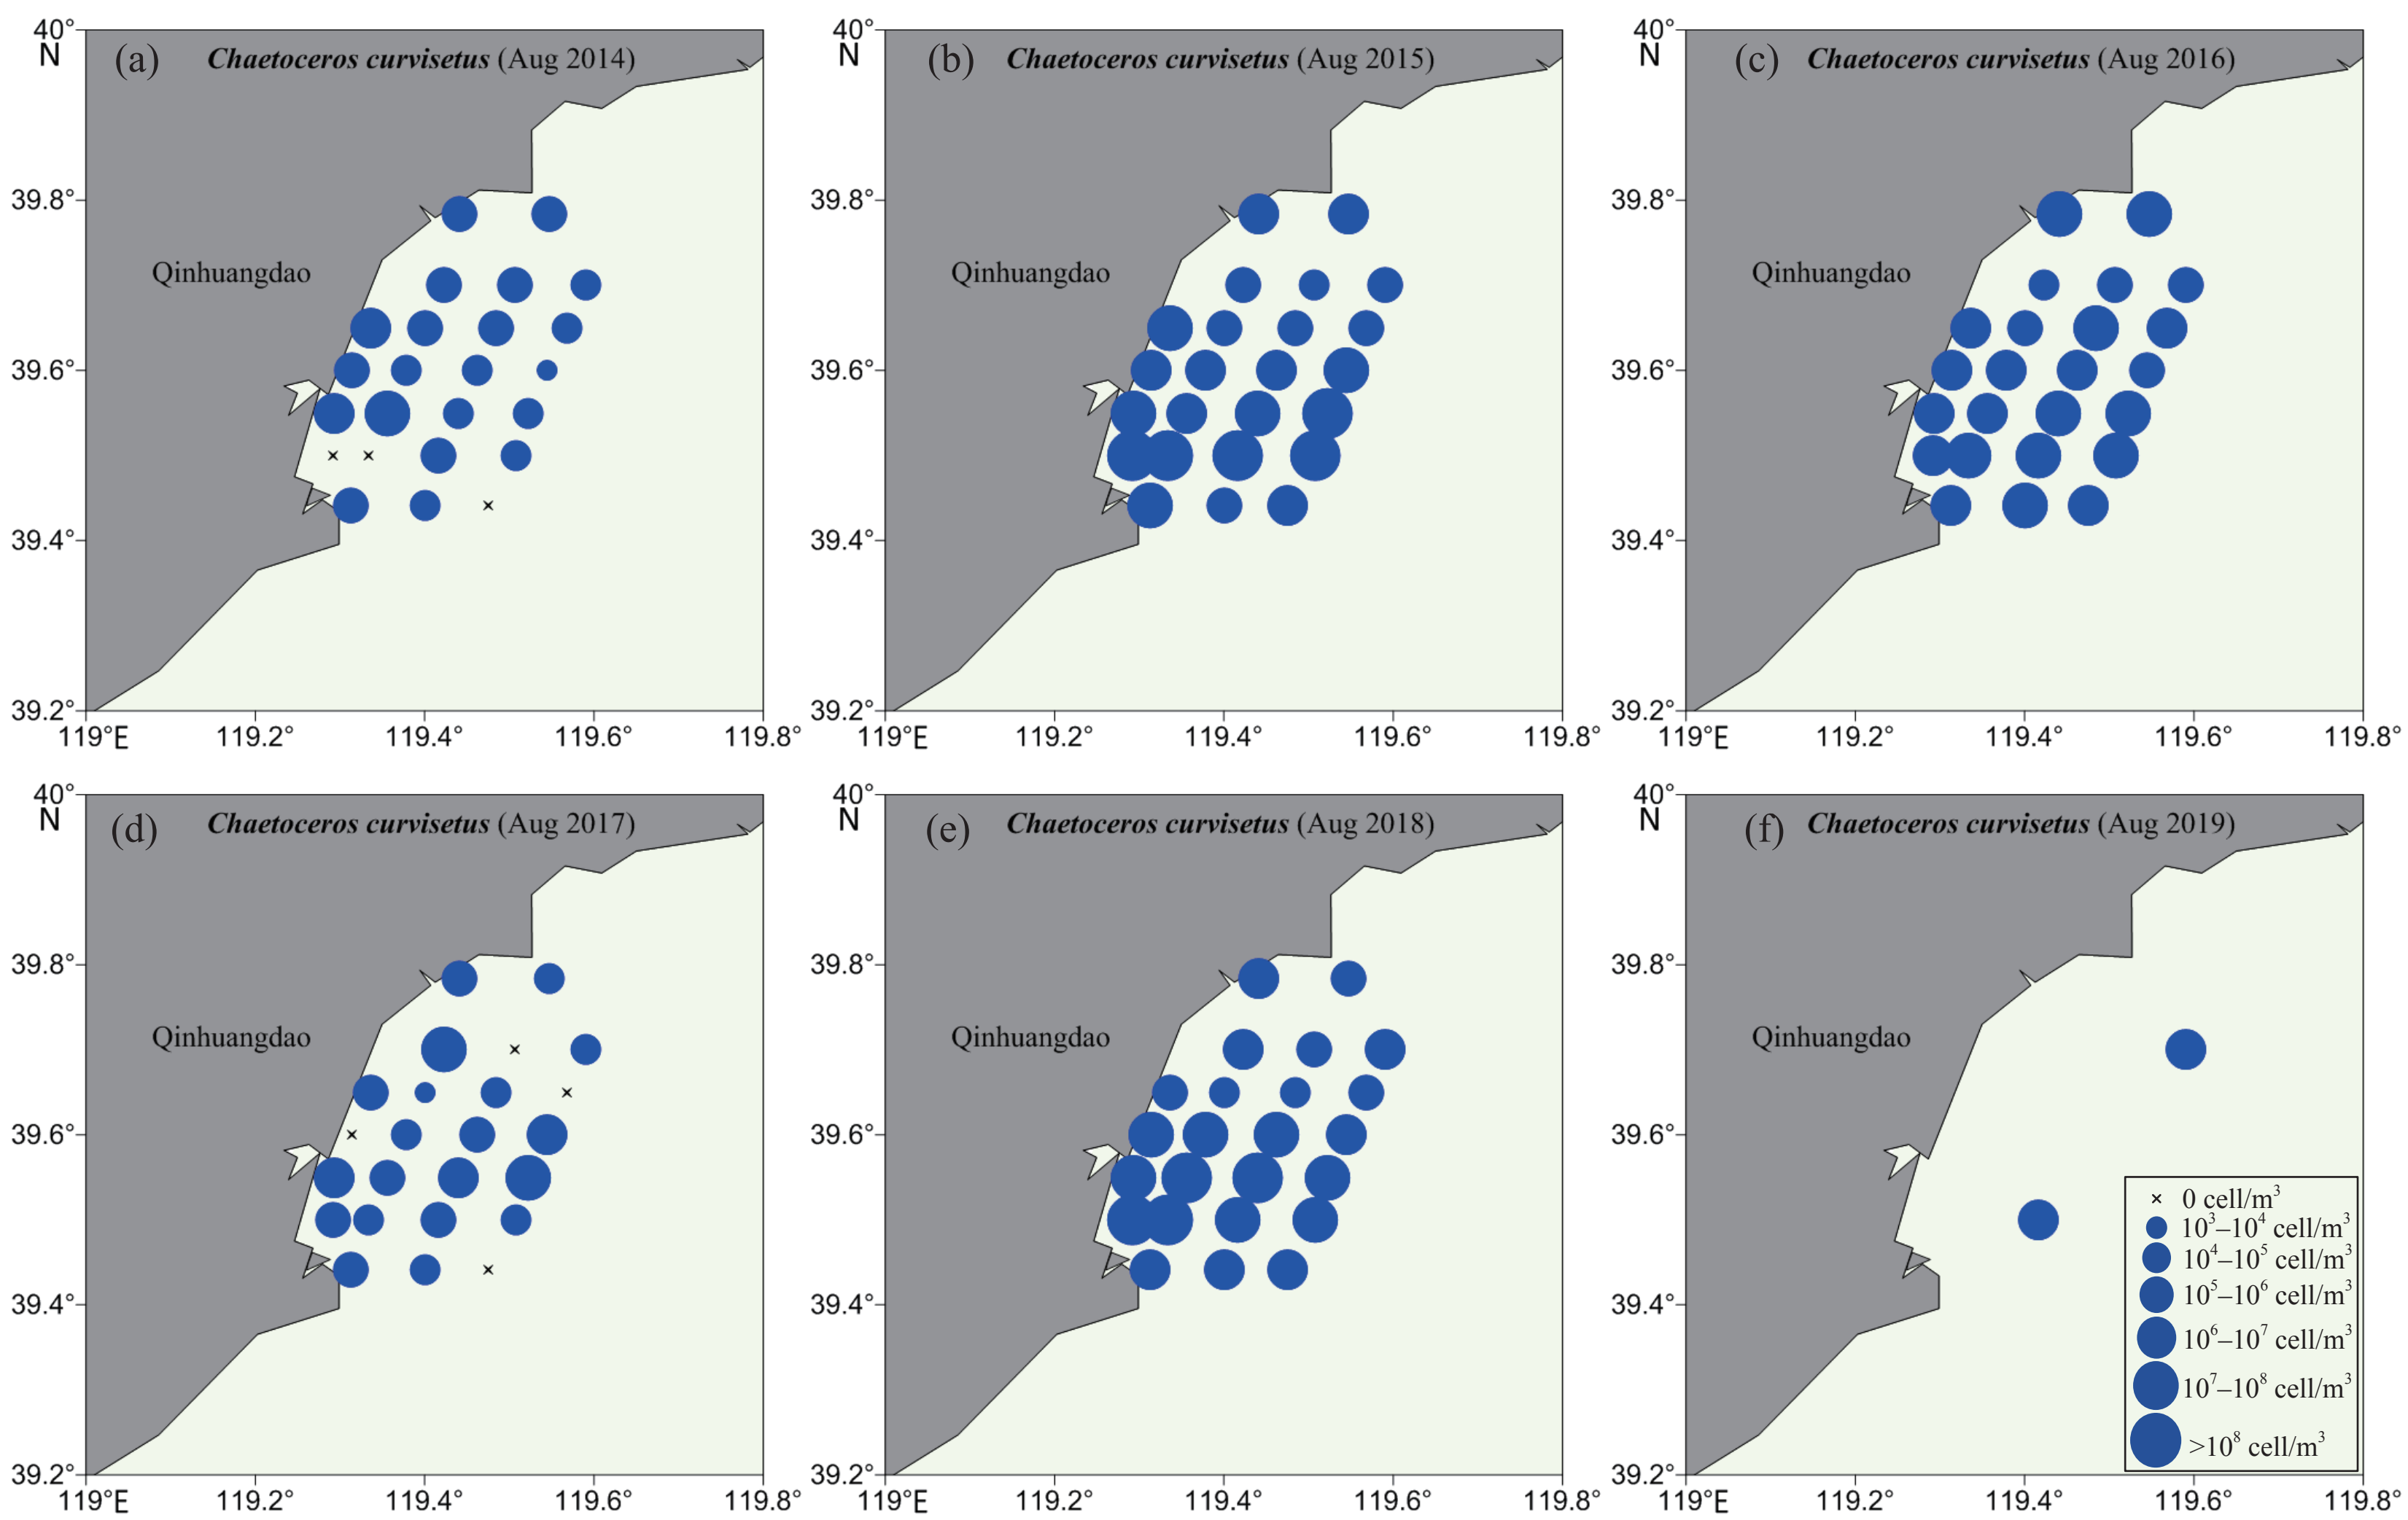

Supplement: s1 [file s1]
